# Supplementary material for: “Mens Sana in Corpore Sano”: The Emerging Link of Motor Reserve with Motor and Cognitive Abilities and Compensatory Brain Networks in SCA2 Patients
Source: MDPI journal article supplement (doi:10.3390/biomedicines10092166), 2022-09-02
Supplement: s1 [file s1]

**Table S1.** Age, education and performances of the different control groups employed.

|                            | Test                                       | n°  | Age (years)   | Education    | Raw score      |
|----------------------------|--------------------------------------------|-----|---------------|--------------|----------------|
| <i>Intellectual level</i>  | QI WAIS-r                                  | 32  | 42,42 (9,51)  | 12,03 (3,8)  | 103,57 (10,76) |
| <i>Executive functions</i> | Phonological fluency                       | 72  | 48,14 (12,70) | 13,42 (3,66) | 40,77 (10,18)  |
|                            | WCST n° perseverative errors               | 43  | 47,44 (12,11) | 13,91 (3,48) | 7,95 (6,85)    |
|                            | Stroop Test - accuracy                     | 43  | 47,44 (12,11) | 13,91 (3,48) | 0,31 (1,57)    |
|                            | Rey's 15 words – Immediate recall *        | 340 | 53,1 (18,00)  | 10,2 (4,30)  | 42,31 (10,16)  |
| <i>Short-term memory</i>   | Forward digit span                         | 63  | 43,56 (14,58) | 12,17 (3,19) | 6,08 (1,24)    |
|                            | Backward digit span                        | 63  | 43,56 (14,58) | 12,17 (3,19) | 4,45 (0,97)    |
|                            | Forward Corsi                              | 63  | 51,13 (15,49) | 12,33 (4,12) | 5,82 (1,19)    |
|                            | Short-Story Recall - Immediate recall *    | 30  | 40 – 49       | 13,3 (3,4)   | 5,95 (1,38)    |
| <i>Long-term memory</i>    | Rey's 15 words – Delayed recall *          | 340 | 53,1 (18,00)  | 10,2 (4,30)  | 8,90 (3,16)    |
|                            | Short-Story Recall - Delayed recall *      | 30  | 40 – 49       | 13,3 (3,4)   | 5,9 (1,45)     |
|                            | MFTC - Accuracy *                          | 465 | 62,1 (20,96)  | 8,92 (5,32)  | 0,94 (0,058)   |
|                            | Lines cancellation task – Accuracy *       | 40  | 69,3 (8,0)    | 8,4 (4,2)    | 59,80 (0,40)   |
| <i>Attention</i>           | Stroop Test – execution time               | 43  | 47,44 (12,11) | 13,91 (3,48) | 19,17 (10,00)  |
|                            | MFTC - Execution time *                    | 465 | 62,1 (20,96)  | 8,92 (5,32)  | 80,95 (40,07)  |
|                            | Lines cancellation task – Execution time * | 40  | 69,3 (8,0)    | 8,4 (4,2)    | 47,30 (24,50)  |
|                            |                                            |     |               |              |                |

\* Published normative data

**Table S2.** Individual scores of International Cooperative Ataxia Rating Scale (ICARS) in SCA2 patients.

| ID           | Posture and Gait Disturbances | Kinetic Functions | Speech Disorders | Oculomotor Disorders | ICARS TOT |
|--------------|-------------------------------|-------------------|------------------|----------------------|-----------|
| CB1          | 13,5                          | 28,5              | 3                | 2                    | 47        |
| CB2          | 12                            | 11                | 2                | 1                    | 26        |
| CB3          | 13                            | 13                | 2                | 0                    | 28        |
| CB4          | 13                            | 10                | 3                | 1                    | 27        |
| CB5          | 13                            | 13                | 3                | 2                    | 31        |
| CB6          | 11                            | 15                | 2                | 0                    | 28        |
| CB7          | 18                            | 15                | 3                | 3                    | 39        |
| CB8          | 7                             | 7                 | 2                | 1                    | 17        |
| CB9          | 8                             | 11                | 3                | 2                    | 24        |
| CB10         | 12                            | 13                | 3                | 1                    | 29        |
| CB11         | 11                            | 12                | 0                | 1                    | 24        |
| CB12         | 24                            | 30                | 5                | 2                    | 61        |
| <b>Means</b> | 12,96                         | 14,87             | 2,58             | 1,33                 | 31,75     |
| <b>(SD)</b>  | (4,44)                        | (7,06)            | (1,16)           | (0,89)               | (11,95)   |

ICARS range: minimum score 0 (absence of motor deficits), maximum score 100 (maximum presence of motor deficits).  
 Postural and gait disturbances: maximum score 34; kinetic functions: maximum score 52; speech disorders: maximum score 8; oculomotor disorders: maximum score 8.
